# Supplementary material
Source: publisher figshare collection journal article supplement (https://geolsoc.figshare.com/ndownloader/files/14358524)
Supplement: Supplementary file 1 [file 14358524]

## Sheet: Sheet1
Table S9 Sandstone chemistry ch.10 MurihikuTerrane XRF
Sample name	N14-220		N14-15	N14-19	N14-20	N14-22		N14-1	N14-2	N14-8	N14-9	N14-10	N14-11
Rock type	med. sandstone		med. sandstone	med. sandstone	med. sandstone	med. sandstone	med. sandstone	fine sandstone	fine sandstone	med. sandstone	med. sandstone	med. sandstone	med. sandstone
Region	Wairora River, Richmond area		Mataora "Island" area, Southland (Permian)	Mataora "Island" area, Southland (Permian)	Mataora "Island" area, Southland (Permian)	Mataora "Island" area, Southland (Permian)		Nugget Point, Southland, Triassic	Nugget Point, Southland, Triassic	Nugget Point, Southland, Triassic	Nugget Point, Southland, Triassic	Nugget Point, Southland, Triassic	Nugget Point, Southland, Triassic
GPS	E25 21088 N59 78599		E21 84802 N54 10339	E21 86061 N54 08807	E21 85941 N54 08618	E21 85381 5408541		E22 63953 N54 13193	E22 63855 N54 13085	E22 64133 N54 13695	E22 64133 N54 13695	E22 63686 N54 13085	E22 63686 N54 13085
Major Elements
SiO2	62.1712		58.6863	39.4764	44.6823	60.1722		59.895	65	68.95	76.91	71.66	76.93
Al2O3	16.513		15.7501	9.79875	10.8439	13.2858		16.8102	16.34	15.14	11.97	14.19	11.82
Fe2O3	6.2818		8.0179	4.79385	4.8441	5.4648		6.7617	4.35	3.06	1.56	3.27	2.17
MgO	2.2638		2.43295	1.97985	1.8894	2.277		3.366	1.7	0.99	0.35	0.98	0.67
CaO	2.4402		3.65435	21.2758	17.8086	5.9301		1.6335	1.92	0.79	0.65	0.98	1.09
Na2O	5.2234		3.87105	2.10045	2.38185	1.9701		5.742	3.65	4.23	5.13	4.29	3.87
K2O	0.95452		1.26178	1.52559	1.1467	2.17998		2.10969	3.27	3.923	1.653	2.41	1.817
TiO2	0.85554		0.982045	0.5025	0.58692	0.71181		0.88506	0.725	0.451	0.316	0.496	0.413
MnO	0.08036		0.14381	0.10251	0.11457	0.09207		0.13266	0.06	0.051	0.068	0.042	0.031
P2O5	0.20286		0.144795	0.08643	0.125625	0.15444		0.15543	0.186	0.068	0.04	0.102	0.067
LOI	2.56		4.63	17.92	15.3	7.54		2.37	2.29	1.85	0.98	1.56	1.09
Total	99.5467		99.5751	99.5622	99.724	99.7783		99.8612	99.491	99.503	99.627	99.98	99.968
Trace Elements
Zn	97.4		99.1	90.7	122.8	101		88.8	79.8	73.5	51.2	64.6	43.2
Cu	14.9		23	26.1	42.9	22.7		21.9	22.3	10.7	3	10.1	5.9
Ni	9.4		7.2	15.6	29.3	11.2		15.2	14.1	8	0.7	8.5	2.7
Cr	22.3		22.6	28.2	78.9	27.9		38.8	39.3	20.8	4.4	25.9	16
V	104.5		174.8	122.4	186	135.5		114.5	117.7	65.2	20.1	71.5	40.9
Ba	332.8		80.7	196	40.6	288		468.9	524.2	654.7	361	538.1	416.1
Sc	16.1		38.8	12.3	15.3	26.2		18.9	18.7	13.3	8.9	15	10.5
La	16.1		2	8.5	1.3	12.7		17.2	25.3	25.5	14.1	22.6	11.7
Ce	46.7		17.4	24.4	11.1	34		51.8	61.2	67.1	41.2	59.5	37.5
Nd	23.3		11.6	15.5	9.2	21		21.7	28.3	30.5	18.3	24.7	14.5
U	1.1		n.d.	0.4	0.5	0.5		2.3	2.6	2.2	2.2	2.4	2
Th	6.2		1	3.9	0.4	4.5		11.9	13	11.3	8.9	11	8.4
Pb	12.7		6.8	6.7	4	5.1		20	19.8	20.9	14.1	16.5	13.1
Nb	10.1		2.7	3	1.5	4.4		9.5	10.2	8.9	7.3	8	6.7
Zr	256.8		86.9	70.4	35.4	109.3		149.4	186	189.6	162.8	178.3	174.5
Y	22.2		29.9	19	10	33.5		21.8	30.2	32.2	18.9	27.4	19.8
Sr	330.8		30.6	272.7	356.9	643.5		173.6	188.2	155	83.6	180.6	158.8
Rb	18.3		15.2	36.1	5.4	48.4		123.3	109.9	132.9	36.3	84.1	55.6
